# Supplementary material for: Brain training improves recovery after stroke but waiting list improves equally: A multicenter randomized controlled trial of a computer-based cognitive flexibility training
Source: PLOS journal article supplement (doi:10.1371/journal.pone.0172993), 2017-03-03
Supplement: S4 (10.1371/journal.pone.0172993.s004) [file journal.pone.0172993.s004.pdf]

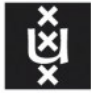

## UvA-DARE (Digital Academic Repository)

### Brain training improves recovery after stroke but waiting list improves equally: A multicenter randomized controlled trial of a computer-based cognitive flexibility training

van de Ven, R.M.; Buitenweg, J.I.V.; Schmand, B.; Veltman, D.J.; Aaronson, J.A.; Nijboer, T.C.W.; Kruiper-Doesborgh, S.J.C.; van Bennekom, C.A.M.; Rasquin, S.M.C.; Ridderinkhof, K.R.; Murre, J.M.J.

#### DOI

[10.1371/journal.pone.0172993](https://doi.org/10.1371/journal.pone.0172993)

#### Publication date

2017

#### Document Version

Other version

#### Published in

PLoS ONE

[Link to publication](#)

#### Citation for published version (APA):

van de Ven, R. M., Buitenweg, J. I. V., Schmand, B., Veltman, D. J., Aaronson, J. A., Nijboer, T. C. W., Kruiper-Doesborgh, S. J. C., van Bennekom, C. A. M., Rasquin, S. M. C., Ridderinkhof, K. R., & Murre, J. M. J. (2017). Brain training improves recovery after stroke but waiting list improves equally: A multicenter randomized controlled trial of a computer-based cognitive flexibility training. *PLoS ONE*, *12*, Article e0172993. <https://doi.org/10.1371/journal.pone.0172993>

#### General rights

It is not permitted to download or to forward/distribute the text or part of it without the consent of the author(s) and/or copyright holder(s), other than for strictly personal, individual use, unless the work is under an open content license (like Creative Commons).

#### Disclaimer/Complaints regulations

If you believe that digital publication of certain material infringes any of your rights or (privacy) interests, please let the Library know, stating your reasons. In case of a legitimate complaint, the Library will make the material inaccessible and/or remove it from the website. Please Ask the library <https://uba.uva.nl/en/contact>, or a letter to: Library of the University of Amsterdam, Secretariat, P.O. Box 19185, 1000 GD Amsterdam, The Netherlands. You will be contacted as soon as possible.



**S3 Table. Mean (standard deviation) and repeated-measures MANOVA of the outcome measures at follow-up.**

| measure                  | Intervention group (n = 38) |                |                | Active control group (n = 35) |                |           | Comparison  |                          |                |            |                          |                |             |                          |                |            |            |  |
|--------------------------|-----------------------------|----------------|----------------|-------------------------------|----------------|-----------|-------------|--------------------------|----------------|------------|--------------------------|----------------|-------------|--------------------------|----------------|------------|------------|--|
|                          | Follow-up                   | Pre-training   |                | Post-training                 |                | Follow-up | Time (T0T3) |                          |                | Time*group |                          |                | Time (T2T3) |                          |                | Time*group |            |  |
|                          |                             | F <sup>α</sup> | p-value        | $\eta_p^2$                    | F <sup>α</sup> |           | p-value     | $\eta_p^2$               | F <sup>α</sup> | p-value    | $\eta_p^2$               | F <sup>α</sup> | p-value     | $\eta_p^2$               | F <sup>α</sup> | p-value    | $\eta_p^2$ |  |
| ToL (optimal - moves)    | -26.9 ( 17.8 )              | -34.0 ( 26.0 ) | -29.0 ( 21.5 ) | -25.6 ( 19.4 )                | 9.2            | <.001*    | .61         | F <sub>( 10 , 62 )</sub> | .82            | .09        | F <sub>( 10 , 62 )</sub> | <.001*         | .39         | F <sub>( 10 , 62 )</sub> | .11            | .21        |            |  |
| Switch RT (ms)           | -321 ( 218 )                | -418 ( 328 )   | -416 ( 316 )   | -378 ( 293 )                  | 6.8            | .01*      | .09         |                          |                |            | 0.7                      | .41            | .01         | 4.3                      | .04            | .06        |            |  |
| Switch Acc (trials)      | -3.0 ( 3.4 )                | -2.2 ( 7.3 )   | -3.0 ( 4.9 )   | -3.4 ( 5.5 )                  | 0.8            | .36       | .01         |                          |                |            | 0.2                      | .65            | .00         | 0.2                      | .70            | .00        |            |  |
| TMT B (sec) <sup>b</sup> | 74.8 ( 37.6 )               | 110.5 ( 47.8 ) | 102.1 ( 42.3 ) | 87.8 ( 41.9 )                 | 28.1           | <.001*    | .28         |                          |                |            | 11.4                     | <.01*          | .14         |                          |                |            |            |  |
| TMT A (sec) <sup>b</sup> | 41.4 ( 15.1 )               | 57.3 ( 20.7 )  | 52.5 ( 24.3 )  | 48.4 ( 20.2 )                 | 33.3           | <.001*    | .32         |                          |                |            | 1.8                      | .18            | .03         |                          |                |            |            |  |
| DSC online (correct)     | 38.5 ( 8.3 )                | 31.7 ( 7.4 )   | 35.0 ( 7.8 )   | 34.7 ( 7.7 )                  | 31.1           | <.001*    | .30         |                          |                |            | 0.2                      | .69            | .00         |                          |                |            |            |  |
| Corsi (span)             | 7.2 ( 1.2 )                 | 6.8 ( 1.1 )    | 7.0 ( 1.0 )    | 6.9 ( 1.1 )                   | 0.4            | .52       | .01         |                          |                |            | 0.2                      | .70            | .00         |                          |                |            |            |  |
| Click (sec) <sup>b</sup> | 28.7 ( 11.8 )               | 37.6 ( 22.1 )  | 30.9 ( 17.2 )  | 31.3 ( 17.1 )                 | 12.7           | <.001*    | .15         |                          |                |            | 0.1                      | .73            | .00         |                          |                |            |            |  |
| Drag (sec) <sup>b</sup>  | 2.1 ( 0.7 )                 | 3.4 ( 2.1 )    | 2.7 ( 1.5 )    | 2.6 ( 1.3 )                   | 29.3           | <.001*    | .29         |                          |                |            | 3.8                      | .06            | .05         |                          |                |            |            |  |
| Peg (sec) <sup>b</sup>   | 66.2 ( 17.1 )               | 83.5 ( 35.9 )  | 71.0 ( 21.1 )  | 73.6 ( 22.0 )                 | 20.5           | <.001*    | .22         |                          |                |            | 2.9                      | .09            | .04         |                          |                |            |            |  |

Note. Follow-up scores were only available for a selection of the tasks. Bold values are considered significant. Pre- and post-training scores of the intervention group can be found in table 4. \* = remains significant after Bonferroni-Holm adjustment; b = lower values represent better performance; T0 = pre-training; T2 = post-training; T3 = 4 weeks after training completion; TMT = Trail Making Test; ToL = Tower of London; Acc = accuracy; DSST = Digit-Symbol-Coding.
